# Supplementary material for: The 2021 update of the EPA’s adverse outcome pathway database
Source: PubMed Central journal article supplement (PMC8275694; doi:10.1038/s41597-021-00962-3), 2021-07-12

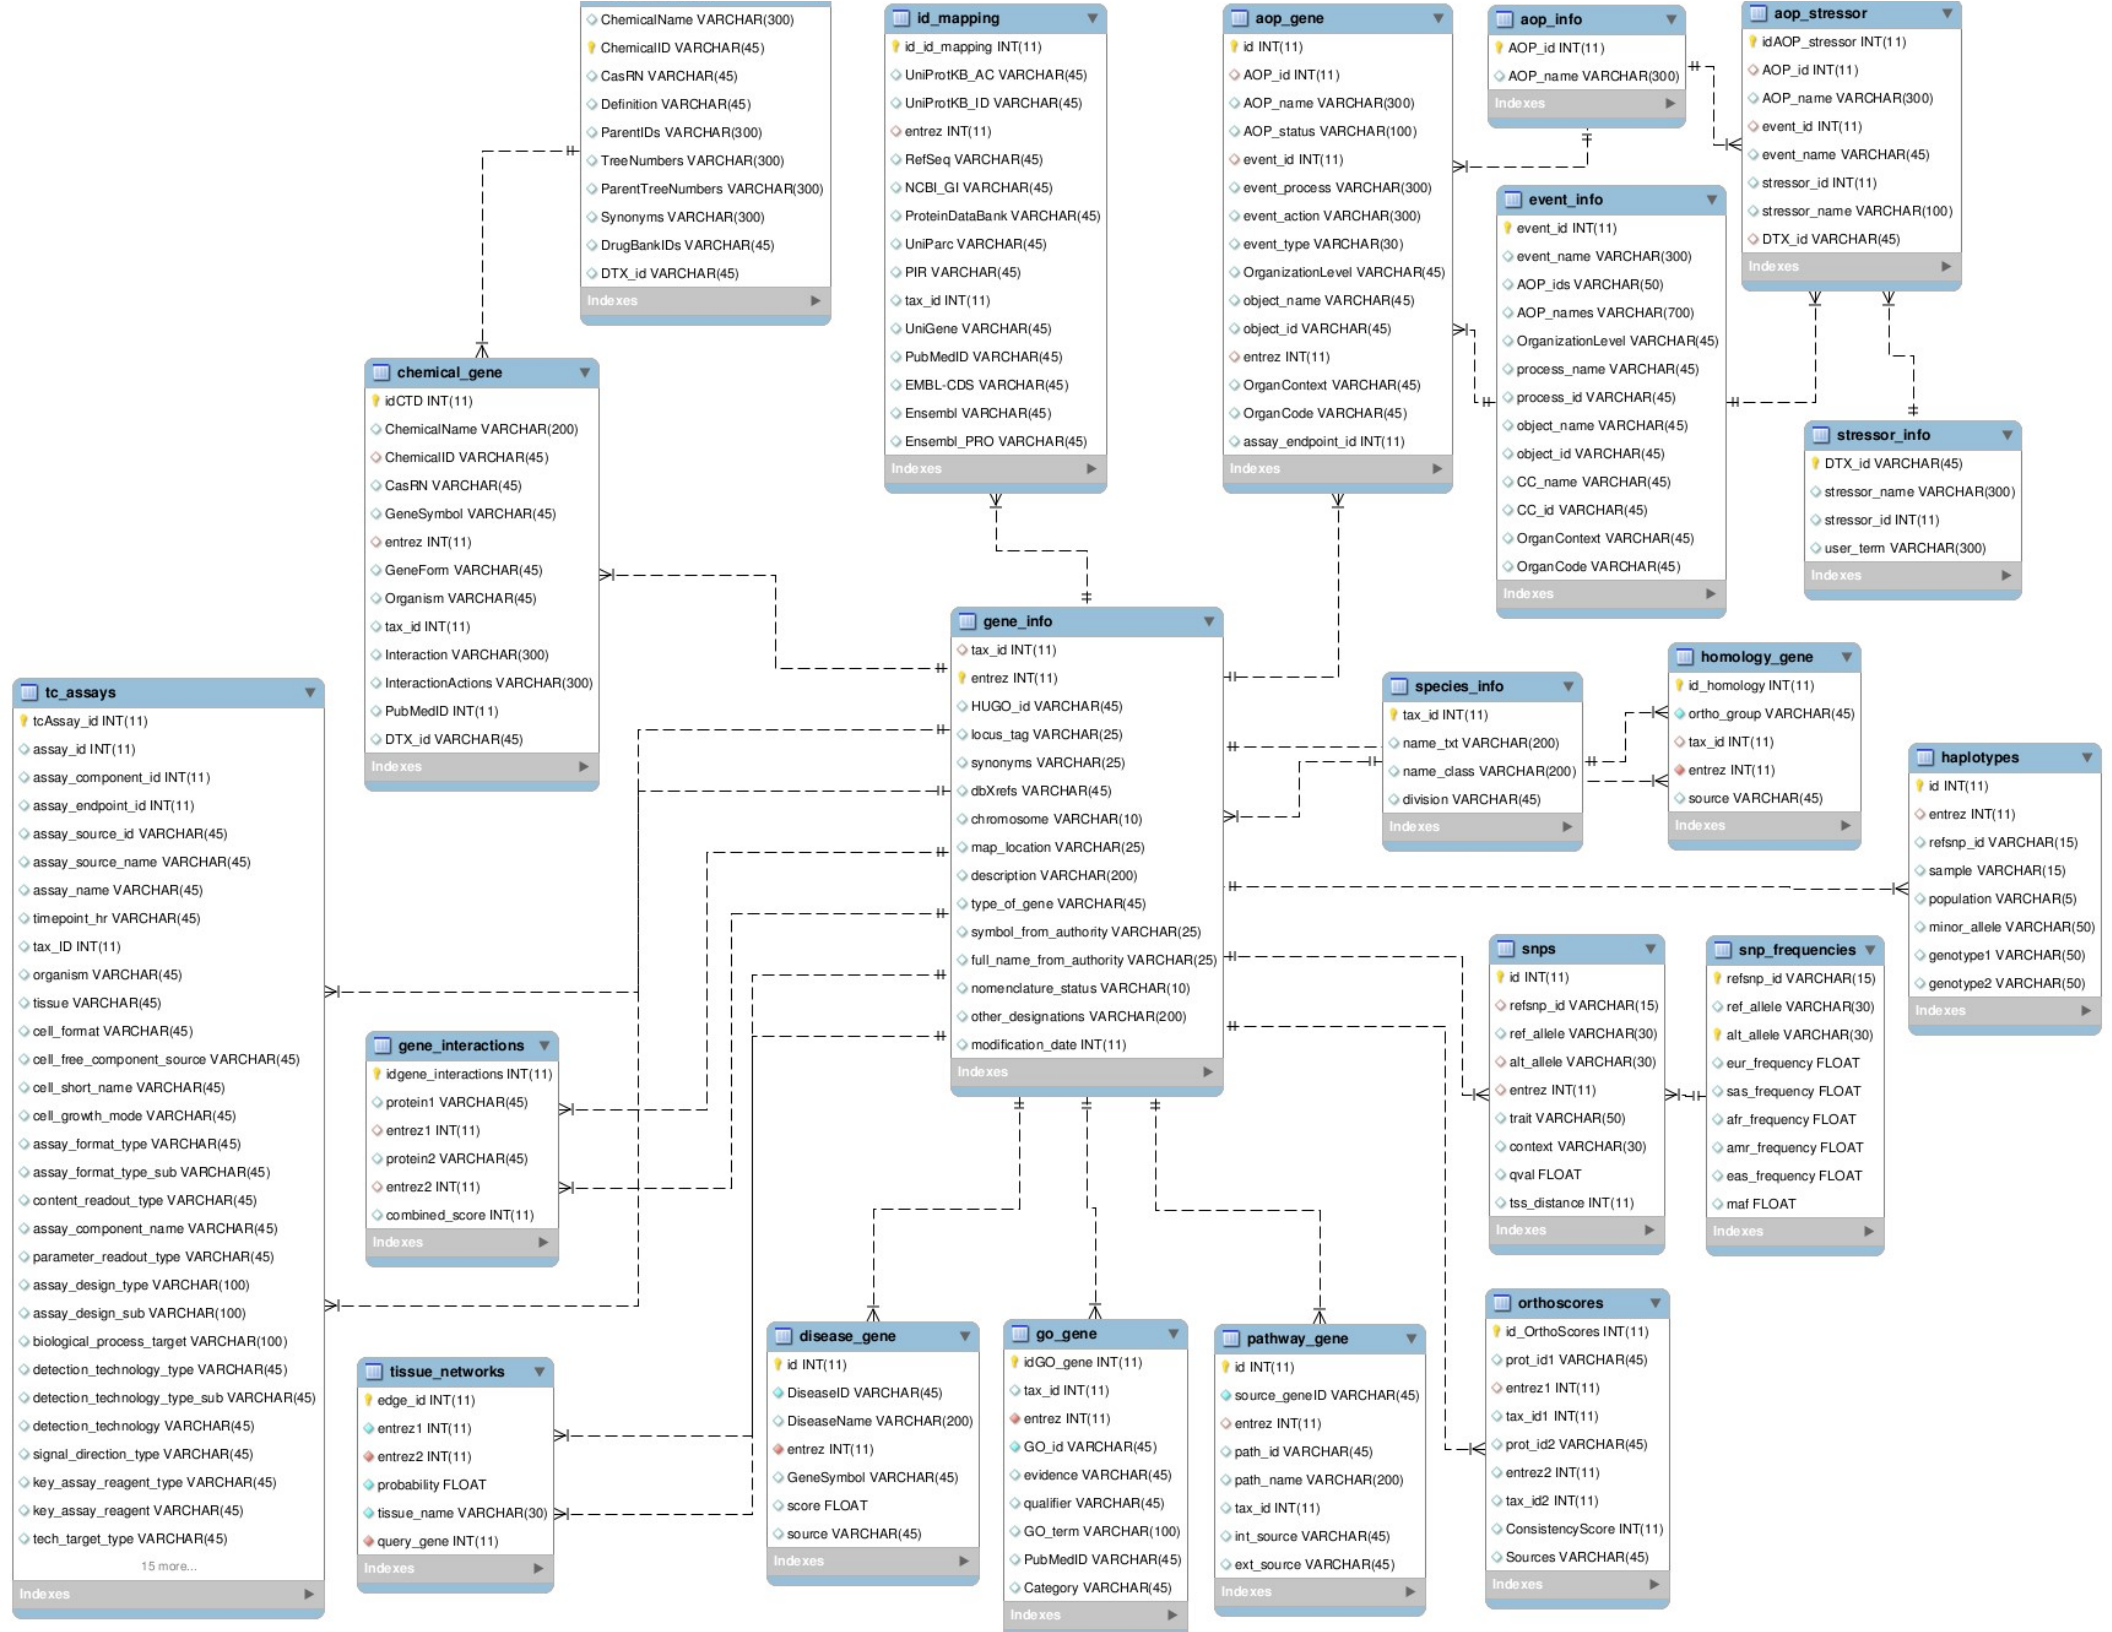

Supplement: 41597_2021_962_MOESM1_ESM.pdf [file 41597_2021_962_MOESM1_ESM.pdf]
